# Supplementary material
Source: PubMed Central journal article supplement (PMC9361238)
Supplement: 134_2022_6836_MOESM1_ESM.pdf [file 134_2022_6836_MOESM1_ESM.pdf]

# **Supplementary Material**

## **Supplementary Methods**

### **Study population**

The COGEN (COvid and GENder) study is an observational cohort study of polymerase chain reaction confirmed SARS-CoV-2 infected individuals diagnosed between February and December 2020 at one of four Swiss study sites including the University Hospital Basel, the University Hospital Zurich, the University Hospital Bern, and the Cantonal Hospital of Baden. Eligible patients were individuals aged  $\geq 18$  years. Informed consent was obtained from all patients or their legally authorized representative, as appropriate. The study design and methodology had been established and validated prior to the start of patient recruitment and were approved by the responsible ethics committee of the canton of Basel (EKNZ, ethics approval #2020-01311). A flowchart depicting patient recruitment is provided in

### **Supplementary Figure 1.**

### **Data acquisition and study questionnaire**

Clinical data of each patient were gathered from electronic medical records at the time of presentation (ambulatory patients) and during hospital stay (admitted patients). Patients or their next of kin were contacted by telephone and asked to complete a questionnaire containing questions on socio-demographics, lifestyle variables, medical comorbidities and risk factors, quality of life, gender-related and sex-specific parameters (e.g. specific hormone treatments). To maintain power of analysis, gender was reduced to one single variable ("gender score") between 0 and 100, as previously reported by Pelletier et al.[1,2] All questionnaire data were collected through the Research Electronic Data Capture (REDCap) survey system.

### **Assessment of sex and gender**

Biological sex is assigned at birth and is defined as a person's biological characteristics such as sex chromosomes, hormone concentrations, and sex organ physiology. In our study, sex was assessed as a binary variable with the answering options "male" or "female. In contrast to sex, gender incorporates psychological, behavioural, social, and cultural aspects, i.e. the sociocultural dimension of being a woman or a man in a given society.[3-5] Gender is composed of four dimensions, reflecting different aspects, e.g. gender roles, gender relations, institutionalized gender, and gender identity.[6,7] Both variables are increasingly recognized as major determinants of health and disease. Nevertheless, the assessment of the sociocultural dimension gender remains a challenge, as many variables need to be considered. There is a general agreement that income, education, responsibility for household work, stress level at home, responsibility for childcare as well as psychological traits associated with femininity/masculinity contribute to gender. [8-12,3,13] To reduce the complexity of gender into a single variable, comparable to biological sex, Pelletier et al. developed a gender score, based on more than 50 variables known to characterise women and men based on sociological evidence. These 50 variables were reduced to key non-redundant items. The latter are acquired via questionnaires and used to construct a gender score, which is a continuous variable ranging between 0 and 100.[1,2] A long version of the questionnaire as well as a short version containing only seven questions was developed and validated in the Canadian GENESIS-PRAXY cohort and was successfully adapted to a German population.[14,11] The short version of the questionnaire was adapted to the Swiss societal system and comprises seven items that were "historically reported as being different in men and women".[14,11] The seven items contained education, parental status, marital status, income (main earner or not), responsibility for household work, stress level at home, responsibility for childcare as well as ten questions on femininity/masculinity as assessed by the well-established BEM sex-role inventory scale (**Supplementary Figure 2**).[15] The gender score was estimated using a logistic regression model, in which (binary) sex is the dependent variable. Therefore, the estimated gender score is the predicted probability of being a woman according to sociocultural variables only, derived from the fitted regression model. The gender

score ranges between 0 and 100 with higher values reflecting characteristics traditionally considered feminine and lower values reflecting characteristics traditionally considered masculine.

### **Statistical analysis**

The primary endpoint of this study was defined as a composite of admission to intermediate or intensive care, the need for invasive ventilatory support, and/or death during hospital stay or within 30 days following discharge, as previously reported.[16] Multiple logistic regression models with backward selection method were applied to assess the potential predictors (indicated in the figure legend) of the study endpoint. Gender was either included as summary variable (gender score) or as multiple variables comprising all parameters that were used to calculate the gender score. First, all potential variables were included into the full model. Then, reduced models were built by removing variables with a p-value >0.2 from the model, one at a time, until all remaining variables had a p-value of <0.15.[17] Some variables such as age, sex, and gender score were forced to stay in the model despite a p-value of >0.15. The goodness of fit of the resulting model was assessed by using likelihood ratio tests comparing it with the full and the reduced model. After the final model was built, the interaction between sex and other variables was explored. The Least Absolute Shrinkage and Selection Operator (LASSO) with extended Bayesian information criterion (EBIC) selection method was performed as a sensitivity analysis using a built-in command “*lasso2*”. Imputation for missing variables was not performed in this study as missing rates were <2%, and it could be assumed that data are missing completely at random (MCAR). Descriptive statistics were presented as appropriate. Estimated effect sizes were presented as adjusted odds ratio (OR) and 95% confidence interval (CI). Statistical analyses were performed using Stata IC15 (StataCorp, 2017, College Station, TX, USA).

### **Supplementary results**

## Patient characteristics

The study population comprised 1357 (45.2%) women and 1648 (54.8%) men with a mean age of  $44.8 \pm 17.5$  years (**Supplementary Table 1**). Men were significantly older than women ( $46.4 \pm 17.8$  years vs  $42.9 \pm 16.9$  years in women,  $p < 0.001$ , **Supplementary Table 1**), had a higher BMI ( $26.3 \pm 4.3$  kg/m<sup>2</sup> vs  $24.5 \pm 5.3$  kg/m<sup>2</sup>,  $p < 0.001$ ), and a higher number of cardiovascular risk factors (CVRFs) ( $0.85 \pm 1.16$  vs  $0.51 \pm 0.89$ ,  $p < 0.001$ , **Supplementary Table 1**). In hospitalized patients, sex-differences in baseline characteristics were less pronounced or no longer evident (**Supplementary Table 2**). Consistent with global Swiss data reported by the Swiss Federal Statistical Office,[18] a greater proportion of women than men reported to earn the lowest income in their household (42.7% vs 15.9%,  $p < 0.001$ , **Supplementary Table 3**). In addition, women were more often single parents (10.5% vs 6.0%,  $p < 0.001$ ), more often divorced/separated (10.7% vs 8.1%,  $p = 0.011$ ) or widowed (3.8% vs 2.4%,  $p = 0.011$ ) and less often in a partnership or married (65.9% vs 68.7%,  $p = 0.011$ ) than men. Women were more often responsible for household work (39.4% vs 16.1%,  $p < 0.001$ ) and caring duties (score from 1 [no responsibility] to 6 [full responsibility]:  $1.92 \pm 2.28$  vs  $1.65 \pm 2.09$ ,  $p < 0.001$ ). No sex differences in educational qualification were noted ( $p = 0.120$ , **Supplementary Table 3**). Conversely, in hospitalized patients, educational qualification was overall lower than in the total population, and higher in men as compared to women ( $p < 0.001$ , data not shown), while similar trends and sex differences were observed for other sociocultural variables. Out of 3005 individuals who were tested positive for SARS-CoV-2, 2401 (79.9%) patients remained outpatients and 604 (20.1%) patients (194 [14.3%] women vs 410 [24.9%] men,  $p < 0.001$ ) were hospitalized. Three-hundred sixty-eight (12.2%) patients (136 [10.0%] women and 232 [14.1%] men) were admitted to a normal ward and 236 (7.9%) patients (58 [4.3%] women and 178 [10.8%] men) needed IMC or ICU care ( $p < 0.001$  for women vs men, **Supplementary Table 4**). Amongst hospitalized patients, men more often than women received circulatory support (30% vs 19.1% in women,  $p = 0.004$ ) and renal replacement therapies (8.1% vs 3.1%,  $p = 0.021$ ), while a similar percentage of women and men received respiratory support (41.7% of men and 42.8% of women,  $p = 0.802$ , **Supplementary Table 4**). COVID-19 medical

treatment with corticosteroids was the most frequently administered therapy (39.7% of hospitalized patients), with men receiving this therapy more often than women (43.4% vs 32.0%,  $p=0.007$ , **Supplementary Table 4**).

### **Study limitations**

Our study has several limitations related to its cross-sectional and observational design. First, although the variables in our study covered many aspects of sex- and gender-specific demographic, behavioral and contextual characteristics, residual confounding due to unmeasured parameters in our dataset is possible. Second, our study was conducted in Switzerland, a high-income country with a high gender-equality index. Given that gender-related characteristics are culturally sensitive, our observations may not be extrapolated to other societies and geographical regions. Third, our study was conducted during an early phase of the pandemic in patients infected with the wildtype of SARS-CoV-2 and our data may not be generalizable to infections with variants, especially omicron. In addition, results may not be generalizable to vaccinated or immune individuals. Finally, 76 patients (2.5%) of our study population did not answer the questionnaire themselves due to severe illness or death. Also, patients were contacted to answer the questionnaire with a time lag of at least 60 days following first diagnosis of SARS-CoV-2 infection to allow time for recovery and rehabilitation. Although only a small percentage (2.5%) of the study population did not answer the study questionnaire themselves and stable conditions showed a minimal recall bias (correlation of 0.8) in our study, the occurrence of a reporting or recall bias, respectively, cannot completely be ruled out.

## References Supplementary Material

1. Pelletier R, Ditto B, Pilote L (2015) A composite measure of gender and its association with risk factors in patients with premature acute coronary syndrome. *Psychosom Med* 77 (5):517-526. doi:10.1097/Psy.0000000000000186
2. Pelletier R, Khan NA, Cox J, Daskalopoulou SS, Eisenberg MJ, Bacon SL, Lavoie KL, Daskupta K, Rabi D, Humphries KH, Norris CM, Thanassoulis G, Behloul H, Pilote L (2016) Sex versus gender-related characteristics: Which predicts outcome after acute coronary syndrome in the young? *J Am Coll Cardiol* 67 (2):127-135. doi:10.1016/j.jacc.2015.10.067  
S0735-1097(15)07355-6 [pii]
3. Research CloH (2018) How to integrate sex and gender into research. <http://www.cihr-irsc.gc.ca/e/50836.html>. Accessed 26.08.2020 2020
4. Research CloH (2017) Online training modules: integrating sex & gender in health research - sex and gender in the analysis of data from human participants. <http://www.cihr-irsc.gc.ca/e/49347.html>.
5. Association AP (2015) *APA Dictionary of Psychology, Second Edition*.
6. Phillips SP (2005) Defining and measuring gender: a social determinant of health whose time has come. *Int J Equity Health* 4:11. doi:10.1186/1475-9276-4-11
7. Johnson JL, Greaves L, Repta R (2009) Better science with sex and gender: Facilitating the use of a sex and gender-based analysis in health research. *Int J Equity Health* 8:14. doi:10.1186/1475-9276-8-14
8. Bem SL The measurement of psychological androgyny. (0022-006X (Print))
9. Smith PH, Bessette AJ, Weinberger AH, Sheffer CE, McKee SA (2016) Sex/gender differences in smoking cessation: A review. *Prev Med* 92:135-140. doi:10.1016/j.ypmed.2016.07.013
10. Lacasse A, Page MG, Choiniere M, Dorais M, Vissandjee B, Nguiefack HLN, Katz J, Samb OM, Vanasse A, Group TCW (2020) Conducting gender-based analysis of existing databases when self-reported gender data are unavailable: the GENDER Index in a working population. *Can J Public Health* 111 (2):155-168. doi:10.17269/s41997-019-00277-2
11. Pohrt A, Kendel F, Demuth I, Drewelies J, Nauman T, Behloul H, Stadler G, Pilote L, Regitz-Zagrosek V, Gerstorff D (2022) Differentiating Sex and Gender Among Older Men and Women. *Psychosom Med* 84 (3):339-346. doi:10.1097/PSY.0000000000001056
12. Nielsen MW, Stefanick ML, Peragine D, Neilands TB, Ioannidis JPA, Pilote L, Prochaska JJ, Cullen MR, Einstein G, Klinge I, LeBlanc H, Paik HY, Schiebinger L (2021) Gender-related variables for health research. *Biol Sex Differ* 12 (1):23. doi:10.1186/s13293-021-00366-3
13. Kachel S, Steffens MC, Niedlich C (2016) Traditional Masculinity and Femininity: Validation of a New Scale Assessing Gender Roles. *Front Psychol* 7:956. doi:10.3389/fpsyg.2016.00956
14. Nauman AT, Behloul H, Alexander N, Kendel F, Drewelies J, Mantantzis K, Berger N, Wagner GG, Gerstorff D, Demuth I, Pilote L, Regitz-Zagrosek V (2021) Gender score

development in the Berlin Aging Study II: a retrospective approach. *Biol Sex Differ* 12 (1):15. doi:10.1186/s13293-020-00351-2

15. Bem SL (1974) The measurement of psychological androgyny. *J Consult Clin Psychol* 42 (2):155-162

16. Liang W, Liang H, Ou L, Chen B, Chen A, Li C, Li Y, Guan W, Sang L, Lu J, Xu Y, Chen G, Guo H, Guo J, Chen Z, Zhao Y, Li S, Zhang N, Zhong N, He J (2020) Development and Validation of a Clinical Risk Score to Predict the Occurrence of Critical Illness in Hospitalized Patients With COVID-19. *JAMA Intern Med*. doi:10.1001/jamainternmed.2020.2033

17. Bursac Z, Gauss CH, Williams DK, Hosmer DW (2008) Purposeful selection of variables in logistic regression. *Source Code Biol Med* 3:17. doi:10.1186/1751-0473-3-17

18. Federal Statistical Office Sitzerland (2021). <https://www.bfs.admin.ch/bfs/en/home/statistics.html>. Accessed 07/07/2022

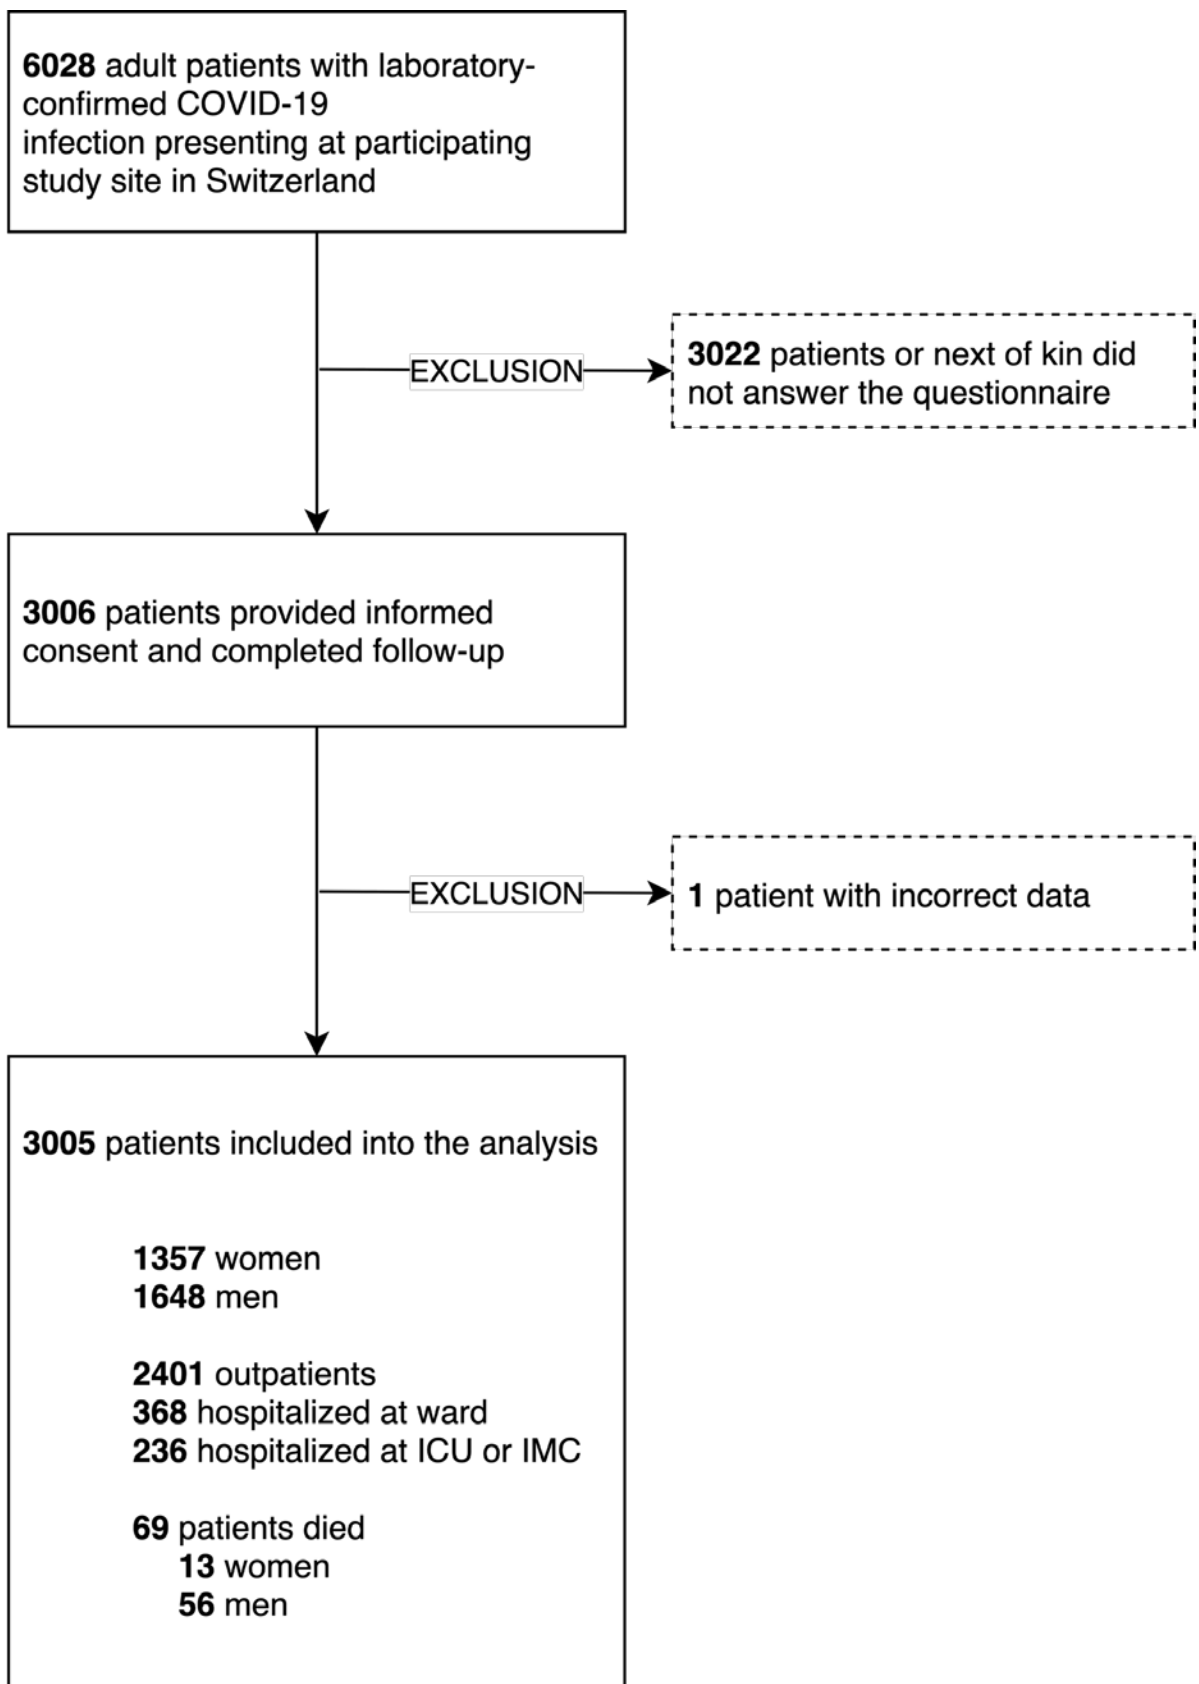

**Supplementary Figure 1:** Flow chart depicting patient recruitment and exclusion. ICU, intensive care unit; IMC, intermediate care unit.



Are/were you a single parent?  Yes  
 No  
 I do not have children

---

What is your marital status?  
 (Select **only one** answer)  Married, living together with spouse  
 Married, but permanently living apart  
 Registered same-sex partnership, living together  
 Registered same-sex partnership, living apart  
 Single, permanent partnership  
 Single, living alone  
 Divorced / partnership dissolved  
 Widowed / life partner deceased

---

What educational qualifications have you gained?  
 Only tick the highest degree that you gained.  
 (Select **only one** answer)  No degree  
 Completion of secondary education  
 Apprenticeship / vocational qualification, specialist baccalaureate, Higher school certificate  
 College, technical college or university

---

Do you earn the highest income in your household?  Yes  
 No  
 The partners contribute in roughly equal shares  
 I live alone

---

Are you the main person responsible for the household work in your household?  Yes  
 No  
 The partners contribute in roughly equal shares  
 I live alone

**On a scale of 1 to 10, how stressed are you at home?**

**Assign an appropriate number to yourself:**  
 (1) = No stress, (10) = Maximum stress

|                |                       |                       |                       |                       |                       |                       |                       |                       |                       |                       |
|----------------|-----------------------|-----------------------|-----------------------|-----------------------|-----------------------|-----------------------|-----------------------|-----------------------|-----------------------|-----------------------|
|                | (1)                   | (2)                   | (3)                   | (4)                   | (5)                   | (6)                   | (7)                   | (8)                   | (9)                   | (10)                  |
| Stress at home | <input type="radio"/> |

**To what extent are you responsible for the care or upbringing of children or grandchildren and/or the care of others living in your household?**

**Assign yourself an appropriate number:**  
 (0) = Not applicable  
 (1) = I have no responsibility  
 (6) = I take full responsibility

|                |                       |                       |                       |                       |                       |                       |                       |
|----------------|-----------------------|-----------------------|-----------------------|-----------------------|-----------------------|-----------------------|-----------------------|
|                | (0)                   | (1)                   | (2)                   | (3)                   | (4)                   | (5)                   | (6)                   |
| Responsibility | <input type="radio"/> |

**On a scale of 1 to 7, please rate the extent to which the following descriptions apply to you.**

(1) = Never true or almost never  
 (7) = True (nearly) always

**I am someone who...**

|                               |                       |                       |                       |                       |                       |                       |                       |
|-------------------------------|-----------------------|-----------------------|-----------------------|-----------------------|-----------------------|-----------------------|-----------------------|
|                               | (1)                   | (2)                   | (3)                   | (4)                   | (5)                   | (6)                   | (7)                   |
| ... defends his own opinion.  | <input type="radio"/> |
| ... has leadership qualities. | <input type="radio"/> |
| ... is independent.           | <input type="radio"/> |
| ... is willing to take risks. | <input type="radio"/> |
| ... is positive.              | <input type="radio"/> |
| ... is assertive.             | <input type="radio"/> |
| ... has a strong personality. | <input type="radio"/> |
| ... is ready to take a stand. | <input type="radio"/> |
| ... is energetic.             | <input type="radio"/> |
| ... is aggressive.            | <input type="radio"/> |

**If you assess yourself: Do you have only male or only female characteristics or both?**

**Assign a corresponding number to yourself:**  
 (1) = more male characteristics  
 (7) = more female characteristics

|                     |                       |                       |                       |                       |                       |                       |                       |
|---------------------|-----------------------|-----------------------|-----------------------|-----------------------|-----------------------|-----------------------|-----------------------|
|                     | (1)                   | (2)                   | (3)                   | (4)                   | (5)                   | (6)                   | (7)                   |
| I feel that I am... | <input type="radio"/> |

**Supplementary Figure 2: Gender-related questions included in the questionnaire.**

| <b>Patient demographic characteristics</b>       | <b>Overall<br/>n=3005</b> | <b>Men<br/>n=1648</b> | <b>Women<br/>n=1357</b> | <b>p-value</b> |
|--------------------------------------------------|---------------------------|-----------------------|-------------------------|----------------|
| Age (years), mean (SD)                           | 44.8 (17.5)               | 46.4 (17.8)           | 42.9 (16.9)             | <0.001         |
| BMI (kg/m <sup>2</sup> ), mean (SD)              | 25.5 (4.9)                | 26.3 (4.3)            | 24.5 (5.3)              | <0.001         |
| <b>Cardiovascular risk factors</b>               |                           |                       |                         |                |
| Number of cardiovascular risk factors, mean (SD) | 0.70 (1.06)               | 0.85 (1.16)           | 0.51 (0.89)             | <0.001         |
| Hypertension, n (%)                              | 596 (19.8)                | 405 (24.6)            | 191 (14.1)              | <0.001         |
| Diabetes mellitus, n (%)                         | 235 (7.8)                 | 176 (10.7)            | 59 (4.3)                | <0.001         |
| Present smoking, n (%)                           | 228 (7.6)                 | 138 (8.4)             | 90 (6.6)                | 0.073          |
| Obesity (BMI>30 kg/m <sup>2</sup> ), n (%)       | 556 (18.5)                | 328 (19.9)            | 228 (16.8)              | 0.029          |
| Family history of CAD, n (%)                     | 59 (2.0)                  | 42 (2.5)              | 17 (1.3)                | 0.011          |
| Dyslipidaemia, n (%)                             | 235 (7.8)                 | 173 (10.5)            | 62 (4.6)                | <0.001         |
| <b>Pre-existing comorbidities</b>                |                           |                       |                         |                |
| Mental disorders, n (%)                          | 130 (4.3)                 | 60 (3.6)              | 70 (5.2)                | 0.042          |
| Autoimmune/rheumatoid disease, n (%)             | 202 (6.7)                 | 87 (5.3)              | 115 (8.5)               | <0.001         |
| Chronic pulmonary disease, n (%)                 | 310 (10.3)                | 166 (10.1)            | 144 (10.6)              | 0.630          |
| Neurological disease, n (%)                      | 162 (5.4)                 | 88 (5.3)              | 74 (5.5)                | 0.890          |
| Cancer, n (%)                                    | 155 (5.2)                 | 99 (6.0)              | 56 (4.1)                | 0.020          |
| <b>Medication</b>                                |                           |                       |                         |                |
| All cardiovascular drugs, n (%)                  | 518 (17.2)                | 356 (21.6)            | 162 (11.9)              | <0.001         |
| ACE inhibitors, n (%)                            | 370 (12.3)                | 254 (15.4)            | 116 (8.5)               | <0.001         |
| Aldosterone antagonists, n (%)                   | 27 (0.9)                  | 21 (1.3)              | 6 (0.4)                 | 0.016          |
| Lipid lowering drugs, n (%)                      | 229 (7.6)                 | 172 (10.4)            | 57 (4.2)                | <0.001         |
| Anticoagulant/antithrombotic medication, n (%)   | 188 (6.3)                 | 141 (8.6)             | 47 (3.5)                | <0.001         |
| Antidiabetics, n (%)                             | 174 (5.8)                 | 134 (8.1)             | 40 (2.9)                | <0.001         |
| Asthma/COPD treatment, n (%)                     | 135 (4.5)                 | 68 (4.1)              | 67 (4.9)                | 0.290          |
| Analgesics, n (%)                                | 323 (10.7)                | 141 (8.6)             | 182 (13.4)              | <0.001         |
| Immunosuppressive medication, n (%)              | 73 (2.4)                  | 37 (2.2)              | 36 (2.7)                | 0.470          |
| Antidepressants, n (%)                           | 77 (2.6)                  | 31 (1.9)              | 46 (3.4)                | 0.009          |
| Neurologic drugs                                 | 23 (0.8)                  | 10 (0.6)              | 13 (1.0)                | 0.270          |
| Anti-infective agents/HIV medication, n (%)      | 20 (0.7)                  | 19 (1.2)              | 1 (0.1)                 | <0.001         |
| Thyroid hormones, n (%)                          | 66 (2.2)                  | 8 (0.5)               | 58 (4.3)                | <0.001         |
| Other medications, n (%)                         | 99 (3.3)                  | 40 (2.4)              | 59 (4.3)                | 0.003          |

**Supplementary Table 1:** Baseline characteristics of the total study population stratified by sex. P-values are reported for comparison between women and men. SD, standard deviation; BMI, body mass index; CAD, coronary artery disease; ACE, angiotensin converting enzyme; COPD, chronic obstructive pulmonary disease; HIV, human immunodeficiency virus.

| <b>Patients demographic characteristics</b>      | <b>Overall<br/>(n=604)</b> | <b>Men<br/>(n=410)</b> | <b>Women<br/>(n=194)</b> | <b>p-value</b> |
|--------------------------------------------------|----------------------------|------------------------|--------------------------|----------------|
| Age (years), mean (SD)                           | 63.37 (15.92)              | 64.26 (14.87)          | 61.47 (17.82)            | 0.044          |
| BMI (kg/m <sup>2</sup> ), mean (SD)              | 28.03 (5.42)               | 27.79 (4.75)           | 28.54 (6.60)             | 0.110          |
| <b>Cardiovascular risk factors</b>               |                            |                        |                          |                |
| Number of cardiovascular risk factors, mean (SD) | 1.77 (1.31)                | 1.86 (1.30)            | 1.48 (1.29)              | 0.001          |
| Hypertension, n (%)                              | 346 (57.3)                 | 245 (59.8)             | 101 (52.1)               | 0.074          |
| Diabetes mellitus, n (%)                         | 163 (27.0)                 | 123 (30.0)             | 40 (20.6)                | 0.015          |
| Present smoking, n (%)                           | 35 (5.8)                   | 27 (6.6)               | 8 (4.1)                  | 0.230          |
| Obesity (BMI>30 kg/m <sup>2</sup> ), n (%)       | 218 (36.1)                 | 144 (35.1)             | 74 (38.1)                | 0.470          |
| Family history of CAD, n (%)                     | 39 (6.5)                   | 32 (7.8)               | 7 (3.6)                  | 0.050          |
| Dyslipidemia, n (%)                              | 171 (28.3)                 | 128 (31.2)             | 43 (22.2)                | 0.021          |
| <b>Pre-existing comorbidities</b>                |                            |                        |                          |                |
| Psychiatric disease, n (%)                       | 71 (11.8)                  | 32 (7.8)               | 39 (20.1)                | <0.001         |
| Autoimmune/rheumatoid disease, n (%)             | 90 (14.9)                  | 51 (12.4)              | 39 (20.1)                | 0.014          |
| Chronic pulmonary disease, n (%)                 | 125 (20.7)                 | 85 (20.7)              | 40 (20.6)                | 0.970          |
| Neurological disease, n (%)                      | 97 (16.1)                  | 64 (15.6)              | 33 (17.0)                | 0.660          |
| Cancer, n (%)                                    | 97 (16.1)                  | 68 (16.6)              | 29 (14.9)                | 0.610          |
| <b>Medications</b>                               |                            |                        |                          |                |
| All cardiovascular drugs, n (%)                  | 285 (47.2)                 | 207 (50.5)             | 78 (40.2)                | 0.018          |
| ACE inhibitors, n (%)                            | 249 (41.2)                 | 179 (43.7)             | 70 (36.1)                | 0.077          |
| Aldosterone antagonists, n (%)                   | 24 (4.0)                   | 19 (4.6)               | 5 (2.6)                  | 0.230          |
| Lipid lowering drugs, n (%)                      | 136 (22.5)                 | 102 (24.9)             | 34 (17.5)                | 0.043          |
| Anticoagulant/antithrombotic medication, n (%)   | 114 (18.9)                 | 88 (21.5)              | 26 (13.4)                | 0.018          |
| Antidiabetics, n (%)                             | 116 (19.2)                 | 89 (21.7)              | 27 (13.9)                | 0.023          |
| Asthma/COPD treatment, n (%)                     | 54 (8.9)                   | 34 (8.3)               | 20 (10.3)                | 0.420          |
| Analgesics, n (%)                                | 119 (19.7)                 | 68 (16.6)              | 51 (26.3)                | 0.005          |
| Immunosuppressive medication, n (%)              | 37 (6.1)                   | 24 (5.9)               | 13 (6.7)                 | 0.690          |
| Antidepressants, n (%)                           | 24 (4.0)                   | 10 (2.4)               | 14 (7.2)                 | 0.005          |
| Neurologic drugs                                 | 9 (1.5)                    | 6 (1.5)                | 3 (1.5)                  | 0.940          |
| Anti-infective agents/HIV medication, n (%)      | 6 (1.0)                    | 5 (1.2)                | 1 (0.5)                  | 0.420          |
| Thyroid hormones, n (%)                          | 11 (1.8)                   | 1 (0.2)                | 10 (5.2)                 | <0.001         |
| Antiandrogens, n (%)                             | 4 (0.7)                    | 4 (1.0)                | 0 (0.0)                  | 0.170          |
| Other medications, n (%)                         | 29 (4.8)                   | 17 (4.1)               | 12 (6.2)                 | 0.270          |

**Supplementary Table 2:** Patient characteristics of hospitalized patients. P-values are reported for comparison between women and men. SD, standard deviation; BMI, body mass index; CAD, coronary artery disease; CVRF, cardiovascular risk factors; ACE, angiotensin-converting enzyme; COPD, chronic obstructive pulmonary disease; HIV, human immunodeficiency virus.

| <b>Sociocultural and economic variables</b>                                                                | <b>Overall<br/>n=3005</b> | <b>Men<br/>n=1648</b> | <b>Women<br/>n=1357</b> | <b>p-value</b> |
|------------------------------------------------------------------------------------------------------------|---------------------------|-----------------------|-------------------------|----------------|
| Healthcare worker, n (%)                                                                                   | 578 (19.4%)               | 179 (10.9%)           | 399 (29.7%)             | <0.001         |
| <b>Source of infection</b>                                                                                 |                           |                       |                         |                |
| Public places/events, n (%)                                                                                | 885 (29.5%)               | 527 (32.0%)           | 358 (26.4%)             | <0.001         |
| At home/family/partner, n (%)                                                                              | 773 (25.7%)               | 353 (21.4%)           | 420 (31.0%)             | <0.001         |
| Unknown, n (%)                                                                                             | 632 (21.0%)               | 368 (22.3%)           | 264 (19.5%)             | 0.054          |
| Work, n (%)                                                                                                | 620 (20.6%)               | 324 (19.7%)           | 296 (21.8%)             | 0.150          |
| Abroad (European country), n (%)                                                                           | 197 (6.6%)                | 119 (7.2%)            | 78 (5.7%)               | 0.100          |
| Health care facility, n (%)                                                                                | 123 (4.1%)                | 73 (4.4%)             | 50 (3.7%)               | 0.300          |
| <b>Parenthood</b>                                                                                          |                           |                       |                         | <0.001         |
| Two-parent family, n (%)                                                                                   | 1737 (58.4)               | 1020 (62.6)           | 717 (53.3)              |                |
| Single-parent family, n (%)                                                                                | 238 (8.0)                 | 97 (6.0)              | 141 (10.5)              |                |
| No children, n (%)                                                                                         | 999 (33.6)                | 513 (31.5)            | 486 (36.2)              |                |
| <b>Marital status</b>                                                                                      |                           |                       |                         | 0.011          |
| Married/partnership, n (%)                                                                                 | 2013 (67.4)               | 1122 (68.7)           | 891 (65.9)              |                |
| Divorced/separated, n (%)                                                                                  | 277 (9.3)                 | 132 (8.1)             | 145 (10.7)              |                |
| Single, n (%)                                                                                              | 605 (20.3)                | 340 (20.8)            | 265 (19.6)              |                |
| Widowed, n (%)                                                                                             | 91 (3.0)                  | 40 (2.4)              | 51 (3.8)                |                |
| <b>Education</b>                                                                                           |                           |                       |                         | 0.120          |
| No educational qualification, n (%)                                                                        | 195 (6.5)                 | 107 (6.5)             | 88 (6.5)                |                |
| Primary education, n (%)                                                                                   | 207 (6.9)                 | 97 (5.9)              | 110 (8.1)               |                |
| Secondary education or vocational degree, n (%)                                                            | 1191 (39.9)               | 654 (40.0)            | 537 (39.8)              |                |
| University or technical college degree, n (%)                                                              | 1392 (46.6)               | 777 (47.5)            | 615 (45.6)              |                |
| <b>Income</b>                                                                                              |                           |                       |                         | <0.001         |
| Earns highest income in household, n (%)                                                                   | 1082 (36.4)               | 818 (50.4)            | 264 (19.6)              |                |
| Earns lowest income in household, n (%)                                                                    | 835 (28.1)                | 258 (15.9)            | 577 (42.7)              |                |
| Equal between partners, n (%)                                                                              | 463 (15.6)                | 241 (14.8)            | 222 (16.4)              |                |
| Lives alone, n (%)                                                                                         | 594 (20.0)                | 307 (18.9)            | 287 (21.3)              |                |
| <b>Main person responsible for household work</b>                                                          |                           |                       |                         | <0.001         |
| No, n (%)                                                                                                  | 715 (24.0)                | 542 (33.3)            | 173 (12.9)              |                |
| Yes, n (%)                                                                                                 | 792 (26.6)                | 262 (16.1)            | 530 (39.4)              |                |
| Equal distribution between partners, n (%)                                                                 | 993 (33.4)                | 579 (35.6)            | 414 (30.8)              |                |
| Lives alone, n (%)                                                                                         | 473 (15.9)                | 244 (15.0)            | 229 (17.0)              |                |
| Average domestic stress level (scale 1-10, 10=maximum), mean (SD)                                          | 3.35 (2.19)               | 3.04 (2.00)           | 3.72 (2.35)             | <0.001         |
| Main responsibility for childcare/care of family members (scale 1-6), mean (SD)                            | 1.77 (2.18)               | 1.65 (2.09)           | 1.92 (2.28)             | <0.001         |
| Masculinity as assessed by BEM scale (scale 1-7, 7=maximum)                                                | 4.93 (0.96)               | 4.98 (0.96)           | 4.86 (0.95)             | <0.001         |
| Defend their own opinion, mean (SD)                                                                        | 5.45 (1.39)               | 5.43 (1.38)           | 5.48 (1.42)             | 0.360          |
| Has leadership qualities, mean (SD).                                                                       | 5.00 (1.52)               | 5.18 (1.46)           | 4.78 (1.57)             | <0.001         |
| Is independent, mean (SD)                                                                                  | 5.65 (1.40)               | 5.60 (1.41)           | 5.70 (1.39)             | 0.064          |
| Is willing to take risks, mean (SD)                                                                        | 4.42 (1.62)               | 4.57 (1.61)           | 4.23 (1.62)             | <0.001         |
| Is positive, mean (SD)                                                                                     | 5.51 (1.39)               | 5.50 (1.39)           | 5.53 (1.40)             | 0.550          |
| Is assertive, mean (SD)                                                                                    | 5.23 (1.32)               | 5.27 (1.30)           | 5.19 (1.35)             | 0.140          |
| Has a strong personality, mean (SD)                                                                        | 5.37 (1.32)               | 5.39 (1.31)           | 5.35 (1.35)             | 0.460          |
| Is ready to take a stand, mean (SD)                                                                        | 5.43 (1.33)               | 5.51 (1.30)           | 5.34 (1.36)             | <0.001         |
| Is energetic, mean (SD)                                                                                    | 4.81 (1.54)               | 4.83 (1.52)           | 4.79 (1.57)             | 0.420          |
| Is aggressive, mean (SD)                                                                                   | 2.45 (1.43)               | 2.59 (1.46)           | 2.27 (1.37)             | <0.001         |
| Self-assessment of gender identity (scale 1-7, 1=only masculine traits, 7=only feminine traits), mean (SD) | 3.77 (2.11)               | 2.33 (1.46)           | 5.52 (1.32)             | <0.001         |

**Supplementary Table 3:** Sociocultural and socioeconomic characteristics of the total study population stratified by sex. SD, standard deviation. P-values are reported for comparison between women and men.

| Acute COVID-19 disease characteristics                               | Overall<br>n=3005  | Men<br>n=1648      | Women<br>n=1357   | p-value |
|----------------------------------------------------------------------|--------------------|--------------------|-------------------|---------|
| <b>Disease severity</b>                                              |                    |                    |                   |         |
| Outpatient, n (%)                                                    | 2401 (79.9)        | 1238 (75.1)        | 1163 (85.7)       | <0.001  |
| Hospital admission, n (%)                                            | 604 (20.1)         | 410 (24.9)         | 194 (14.3)        |         |
| Normal ward hospitalization, n (%)                                   | 368 (12.2)         | 232 (14.1)         | 136 (10.0)        |         |
| ICU or IMC hospitalization, n (%)                                    | 236 (7.9)          | 178 (10.8)         | 58 (4.3)          |         |
| Length of ICU stay (days), median (IQR)                              | 10 (4, 19) [n=221] | 11 (4, 21) [n=169] | 8 (3, 16) [n=52]  | 0.125   |
| Length of hospital stay (days), median (IQR)                         | 9 (4, 18) [n=567]  | 9 (5, 20) [n=386]  | 8 (4, 14) [n=181] | 0.003   |
| Hospital readmission during follow-up, n (%)                         | 88/528 (16.7)      | 57/349 (16.3)      | 31/179 (17.3)     | 0.773   |
| <b>Critical illness (primary outcome)</b>                            |                    |                    |                   |         |
| Critical illness, n (%)                                              | 263 (8.8)          | 195 (11.8)         | 68 (5.0)          | <0.001  |
| Death, n (%)                                                         | 69 (2.3)           | 56 (3.4)           | 13 (1.0)          | <0.001  |
| Admission to ICU/IMC, n (%)                                          | 236 (7.9)          | 178 (10.8)         | 58 (4.3)          | <0.001  |
| Mechanical ventilation support, n (%)                                | 187 (6.2)          | 142 (8.6 %)        | 45 (3.3)          | <0.001  |
| <b>Symptoms at presentation for acute COVID-19</b>                   |                    |                    |                   |         |
| Average number of symptoms, mean (SD)                                | 4.3 (2.1)          | 4.0 (2.0)          | 4.6 (2.1)         | <0.001  |
| Physical weakness, n (%)                                             | 2187 (72.8)        | 1131 (68.6)        | 1056 (77.8)       | <0.001  |
| Fatigue, n (%)                                                       | 1920 (63.9)        | 1003 (60.9)        | 917 (67.6)        | <0.001  |
| Smell and taste changes, n (%)                                       | 1856 (61.8)        | 915 (55.5)         | 941 (69.3)        | <0.001  |
| Fever, n (%)                                                         | 1599 (53.2)        | 932 (56.6)         | 667 (49.2)        | <0.001  |
| Headache, n (%)                                                      | 1565 (52.1)        | 757 (45.9)         | 808 (59.5)        | <0.001  |
| Cough, n (%)                                                         | 1439 (47.9)        | 798 (48.4)         | 641 (47.2)        | 0.520   |
| Dyspnoea/lower respiratory symptoms, n (%)                           | 788 (26.2)         | 400 (24.3)         | 388 (28.6)        | 0.007   |
| Gastrointestinal symptoms, n (%)                                     | 616 (20.5)         | 277 (16.8)         | 339 (25.0)        | <0.001  |
| Musculoskeletal symptoms, n (%)                                      | 366 (12.2)         | 166 (10.1)         | 200 (14.7)        | <0.001  |
| ENT, n (%)                                                           | 267 (8.9)          | 98 (5.9)           | 169 (12.5)        | <0.001  |
| Neurological symptoms, n (%)                                         | 129 (4.3)          | 39 (2.4)           | 90 (6.6)          | <0.001  |
| Cardiovascular symptoms, n (%)                                       | 76 (2.5)           | 37 (2.2)           | 39 (2.9)          | 0.270   |
| Dermatologic symptoms, n (%)                                         | 15 (0.5)           | 5 (0.3)            | 10 (0.7)          | 0.093   |
| Psychiatric symptoms, n (%)                                          | 12 (0.4)           | 8 (0.5)            | 4 (0.3)           | 0.410   |
| Other, n (%)                                                         | 13 (0.4)           | 7 (0.4)            | 6 (0.4)           | 0.940   |
| <b>COVID-19 medical treatment*</b>                                   |                    |                    |                   |         |
|                                                                      | <b>n=604</b>       | <b>n=410</b>       | <b>n=194</b>      |         |
| Corticosteroids, n (%)                                               | 240 (39.7)         | 178 (43.4)         | 62 (32.0)         | 0.007   |
| Chloroquine/Hydroxychloroquine, n (%)                                | 145 (24.0)         | 102 (24.9)         | 43 (22.2)         | 0.470   |
| Remdesivir, n (%)                                                    | 143 (23.7)         | 108 (26.3)         | 35 (18.0)         | 0.025   |
| Ritonavir/Lopinavir, n (%)                                           | 87 (14.4)          | 60 (14.6)          | 27 (13.9)         | 0.810   |
| Tocilizumab, n (%)                                                   | 48 (7.9)           | 37 (9.0)           | 11 (5.7)          | 0.150   |
| Convalescent plasma, n (%)                                           | 26 (4.3)           | 20 (4.9)           | 6 (3.1)           | 0.310   |
| Immunoglobulins, n (%)                                               | 2 (0.3)            | 2 (0.5)            | 0 (0.0)           | N/A     |
| Extracorporeal cytokine adsorption or plasma exchange therapy, n (%) | 2 (0.3)            | 2 (0.5)            | 0 (0.0)           | N/A     |
| Other, n (%)                                                         | 82 (13.6)          | 56 (13.7)          | 26 (13.4)         | 0.93    |
| <b>Organ support during acute disease*</b>                           |                    |                    |                   |         |
|                                                                      | <b>n=604</b>       | <b>n=410</b>       | <b>n=194</b>      |         |
| Any respiratory support, n (%)                                       | 254 (42.1)         | 171 (41.7)         | 83 (42.8)         | 0.802   |
| Circulatory support, n (%) <sup>#</sup>                              | 160 (26.5)         | 123 (30.0)         | 37 (19.1)         | 0.004   |
| Renal replacement therapy, n (%)                                     | 39 (6.5)           | 33 (8.1)           | 6 (3.1)           | 0.021   |

**Supplementary Table 4:** Characteristics of acute COVID-19 illness in the total study population stratified by sex. P-values are reported for comparison between women and men. IQR, interquartile range; ICU, intensive care unit; IMC, intermediate care; ENT, ear nose throat, \*data available only in hospitalized patients; <sup>#</sup>comprising Impella, extracorporeal membrane oxygenation (ECMO) or vasoactive medication.
